# Supplementary material for: An isolated CLASP TOG domain suppresses microtubule catastrophe and promotes rescue
Source: PubMed Central journal article supplement — Mol Biol Cell. 2018 Jun 1;29(11):1359–75. doi: 10.1091/mbc.E17-12-0748 (PMC5994897; doi:10.1091/mbc.e17-12-0748), 2018-06-01

# Supplemental Materials

*Molecular Biology of the Cell*

Majumdar et al.

### **Supplemental Figure 1: SDS-PAGE of proteins used in this study**

Purity of different constructs and mutants as analyzed by SDS-PAGE. Molecular weight markers are in kDa. Tubulin concentration is 3  $\mu$ M; all others are 10  $\mu$ M.

### **Supplemental Figure 2: Affinity of TOG2 to unpolymerized tubulin determined by MST**

Binding of TOG2 to unpolymerized tubulin analyzed by microscale thermophoresis. [Tubulin] in all samples was 40 nM and TOG added in a 15-point 1:1 dilution series with highest concentration at 120  $\mu$ M. Normalized fluorescence scans for different TOG concentrations show changes in fluorescent counts over time showing pre-IR, IR-on and post-IR phases (top panel). Aberrant thermophoresis was detected for high [TOG2] samples and excluded from the binding isotherm (not shown). The data showing relative change in fluorescence versus protein concentration fit well to a single-site binding model (bottom panel), yielding  $K_D = 2.6 \mu$ M.

### **Supplemental Figure 3: Comparing Stu1-TOG2 to 'arched' and 'flat' TOG domains**

Different configurations of the tubulin-binding interface on selected TOG domains. In each panel a cartoon representation of a given TOG is shown inside of its solvent-accessible surface (transparent grey). Evolutionarily conserved W,R residues implicated in tubulin binding are shown in space-filling representation at the 'top' and 'bottom' of the tubulin binding surface. Line drawings emphasize the shape of the tubulin-binding surface and the important W,R residues. Stu1-TOG2 does not show the 'arched' configuration observed for hCLASP1. The arrow on the Stu1-TOG2 panel indicates the 'retraction' of the conserved Tryptophan. Top left: CLASP-family TOG: hCLASP1, PDB code 4K92, grey.

Top right: polymerase-family TOG: Stu2-TOG2, PDB code 4U3J, blue.

Bottom: CLASP-family TOG: Stu1-TOG2, PDB code 6COK, this study, orange.

### **Supplemental Figure 4: TOG1 does not affect MT dynamics**

Quantification of the microtubule dynamics in presence of 200 nM TOG1 (in black; data for Control, grey, and TOG2, red, are reproduced from Figure 5). From left to right: growing rates do not change substantially (control:  $17.9 \pm 0.2 \mu$ m/hr,  $n = 245$ ; +TOG1:  $16.8 \pm 0.3 \mu$ m/hr,  $n = 38$ ; for comparison +TOG2:  $18.8 \pm 0.3 \mu$ m/hr,  $n = 126$ ); in contrast to the anti-catastrophe activity we observed for Stu1-TOG2, no change in catastrophe frequency is observed in the presence of TOG1 (control:  $0.098 \{0.094, 0.100\} \text{ min}^{-1}$ ,  $n = 57, 160$ ; +TOG2:  $0.025 \{0.024, 0.027\} \text{ min}^{-1}$ ,  $n = 44, 38$ ; +TOG1:  $0.092 \text{ min}^{-1}$ ,  $n = 36$ ). No rescues were observed in the presence of TOG1 (control: no rescues; +TOG1: no rescues; for comparison +TOG2:  $19 \{18, 20\} \text{ min}^{-1}$ ,  $n = 21, 16$  rescues). Values reported for control and +TOG2 are weighted average over two independent experiments with the averages from each separate experiment given in braces to provide a measure of experimental variation, followed by number of observed events in

each trial. Values for +TOG1 are from a single trial.

### **Supplemental Figure 5: Folding and stability of Stu1-TOG2 mutants assessed by CD**

- A.** CD spectra of TOG2 and mutants showing characteristic secondary structural features in the far-UV. Amplitudes of the spectra vary due to differences in concentrations
- B.** Normalized spectra show nearly perfect overlap indicating that the point mutations do not cause large-scale structural changes
- C.** Melting curves (CD monitored at 221nm) in response to heating from 298.15 K to 368.15 K. Mutants show similar melting transition to wildtype TOG2, with the R386A mutant being slightly destabilized (see **D** for melting temperatures derived from these curves)
- D.** Apparent  $T_m$  for wildtype and mutant TOG2. Point mutations do not have significant effect on protein stability

### **Supplemental Figure 6: Affinity of Stu1-TOG2 W339A,R525A to MT lattice**

**A.** Stu1-TOG2 W339A,R525A binds very weakly to MT lattice. Binding isotherm of Stu1-TOG2 W339A,R525A (purple) and TOG2 (red) to MT lattice showing normalized intensity on the lattice versus concentration and fit to a single-site binding model. TOG2 data reproduced from Figure 2. Concentrations of Stu1-TOG2 W339A,R525A were 0.5, 1, 2, 5, 10, 15, 20  $\mu$ M.  $n = 15$  scans per concentration for a single Stu1-TOG2 W339A,R525A titration (purple).

Top right: polymerase-family TOG: Stu2-TOG2, PDB code 4U3J, blue.

Bottom: CLASP-family TOG: Stu1-TOG2, PDB code 6COK, this study, orange.

### **Supplemental Figure 4: TOG1 does not affect MT dynamics**

Quantification of the microtubule dynamics in presence of 200 nM TOG1 (in black; data for Control, grey, and TOG2, red, are reproduced from Figure 5). From left to right: growing rates do not change substantially (control:  $17.9 \pm 0.2$   $\mu$ m/hr,  $n = 245$ ; +TOG1:  $16.8 \pm 0.3$   $\mu$ m/hr,  $n = 38$ ; for comparison +TOG2:  $18.8 \pm 0.3$   $\mu$ m/hr,  $n = 126$ ); in contrast to the anti-catastrophe activity we observed for Stu1-TOG2, no change in catastrophe frequency is observed in the presence of TOG1 (control:  $0.098 \{0.094, 0.100\}$   $\text{min}^{-1}$ ,  $n = 57, 160$ ; +TOG2:  $0.025 \{0.024, 0.027\}$   $\text{min}^{-1}$ ,  $n = 44, 38$ ; +TOG1:  $0.092$   $\text{min}^{-1}$ ,  $n = 36$ ). No rescues were observed in the presence of TOG1 (control: no rescues; +TOG1: no rescues; for comparison +TOG2:  $19 \{18, 20\}$   $\text{min}^{-1}$ ,  $n = 21, 16$  rescues). Values reported for control and +TOG2 are weighted average over two independent experiments with the averages from each separate experiment given in braces to provide a measure of experimental variation, followed by number of observed events in each trial. Values for +TOG1 are from a single trial.

### **Supplemental Figure 5: Folding and stability of Stu1-TOG2 mutants assessed by CD**

**A.** CD spectra of TOG2 and mutants showing characteristic secondary structural features in the far-UV. Amplitudes of the spectra vary due to differences in concentrations

- B.** Normalized spectra show nearly perfect overlap indicating that the point mutations do not cause large-scale structural changes
- C.** Melting curves (CD monitored at 221nm) in response to heating from 298.15 K to 368.15 K. Mutants show similar melting transition to wildtype TOG2, with the R386A mutant being slightly destabilized (see **D** for melting temperatures derived from these curves)
- D.** Apparent  $T_m$  for wildtype and mutant TOG2. Point mutations do not have significant effect on protein stability

**Supplemental Figure 6: Affinity of Stu1-TOG2 W339,R525A to MT lattice**

**A.** Stu1-TOG2 W339A,R525A binds very weakly to MT lattice. Binding isotherm of Stu1-TOG2 W339A,R525A (purple) and TOG2 (red) to MT lattice showing normalized intensity on the lattice versus concentration and fit to a single-site binding model. TOG2 data reproduced from Figure 2. Concentrations of Stu1-TOG2 W339A,R525A were 0.5, 1, 2, 5, 10, 15, 20  $\mu$ M.  $n = 15$  scans per concentration for a single Stu1-TOG2 W339A,R525A titration (purple).

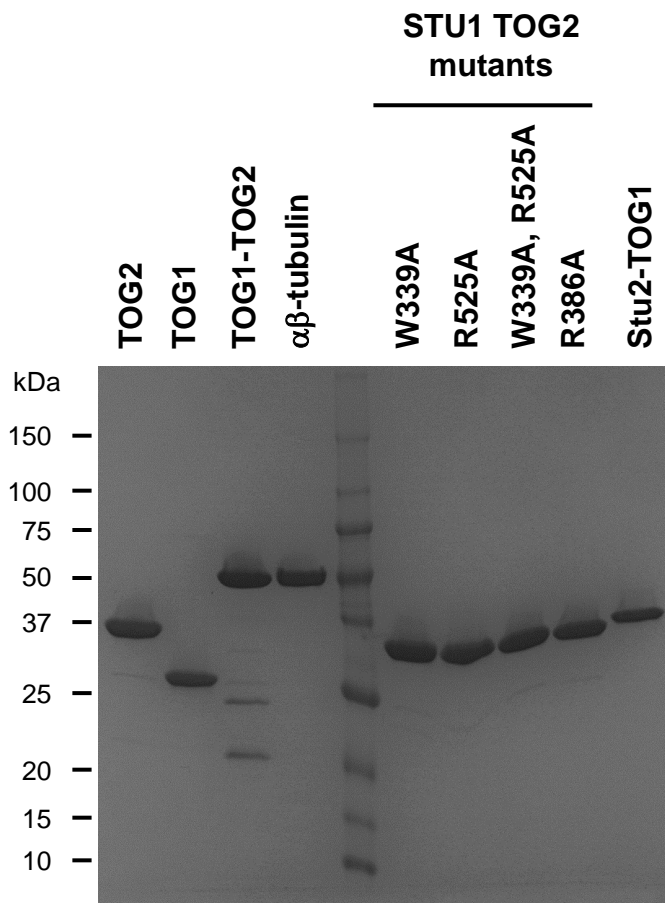

$K_D = 2.6 [1.6, 4.6] \mu\text{M}$ 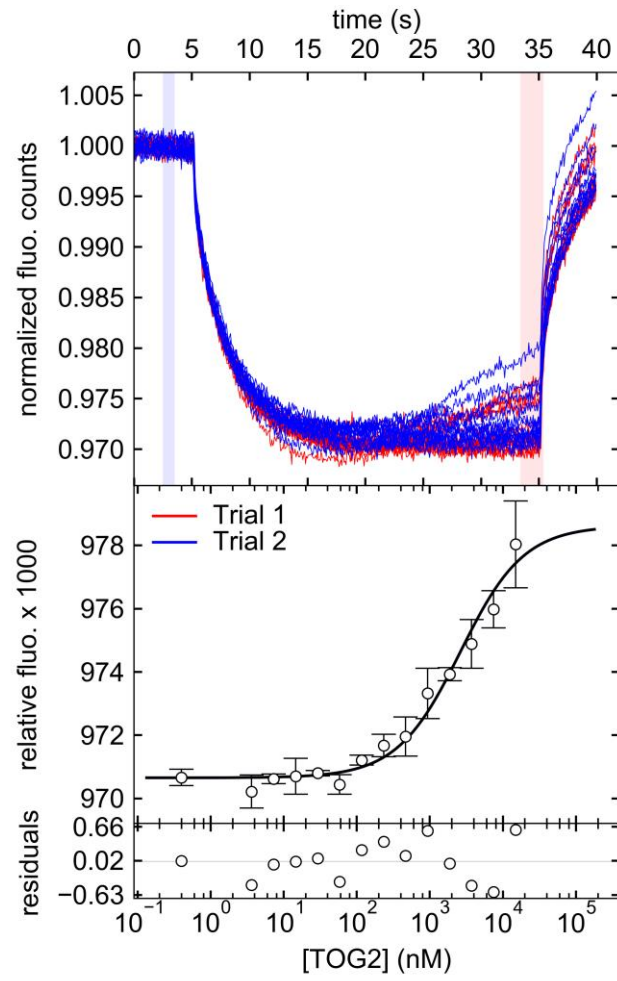

**hCLASP1-TOG2: 'arched'**

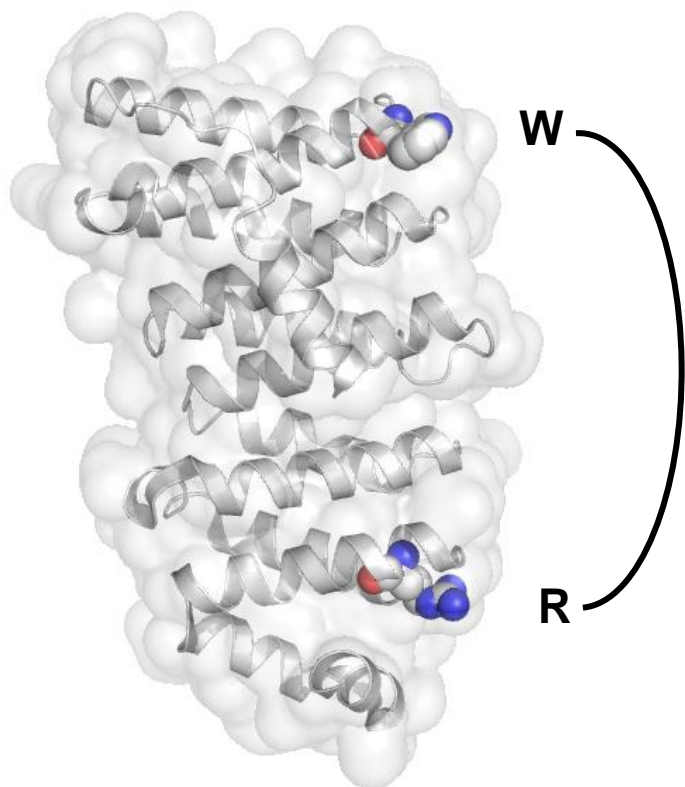

**Stu2-TOG2: 'flat'**

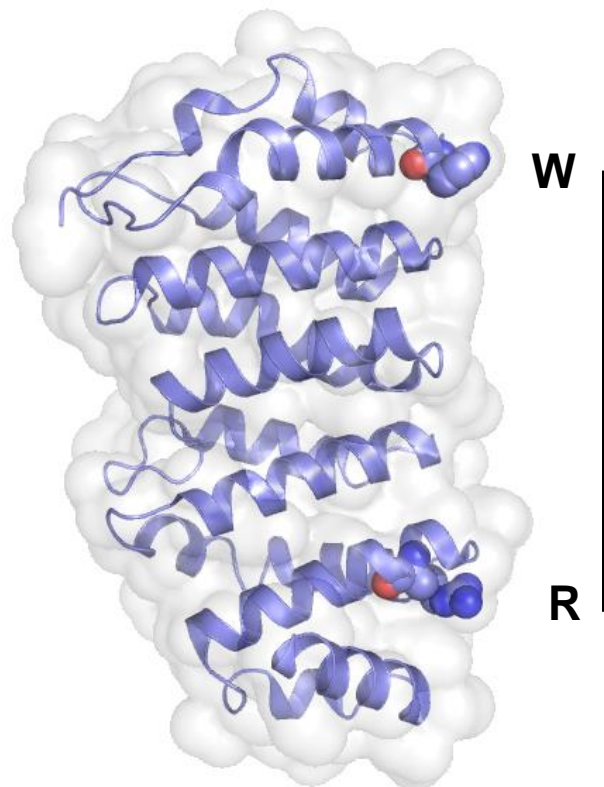

**Stu1-TOG2: 'flat'**

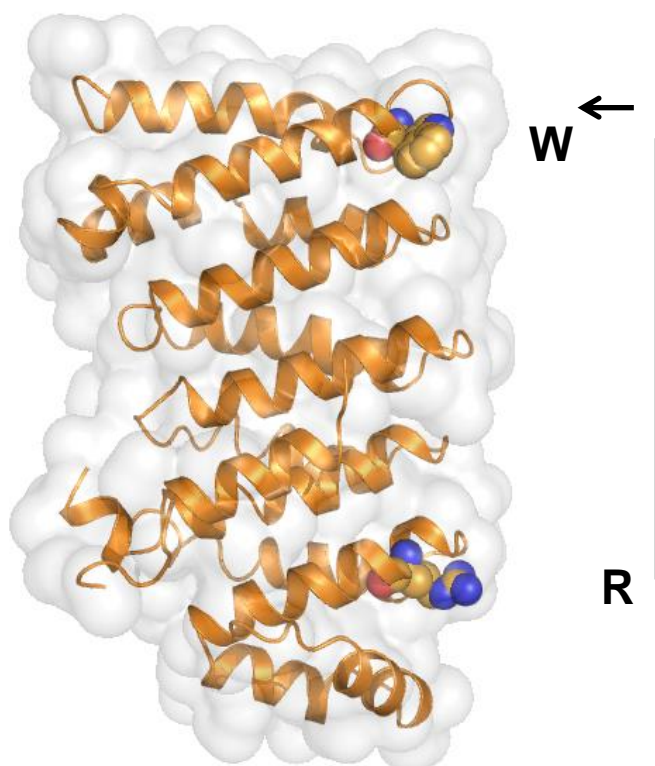

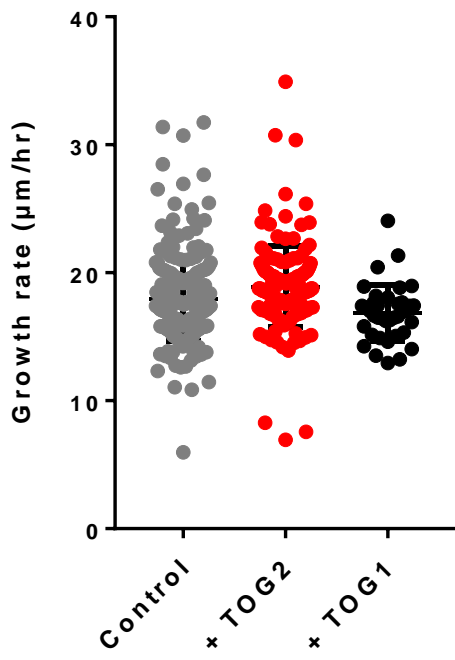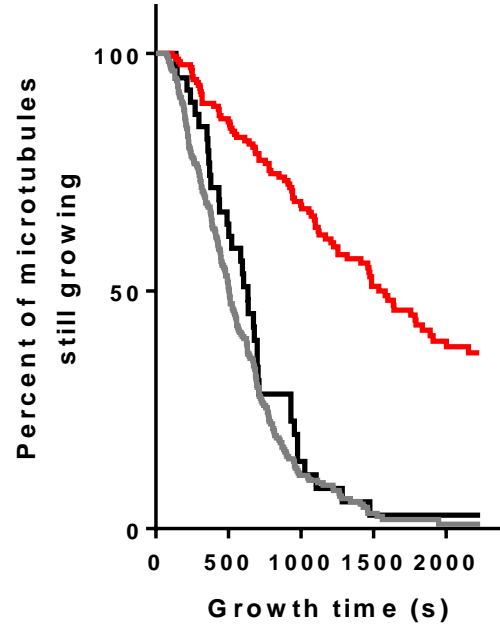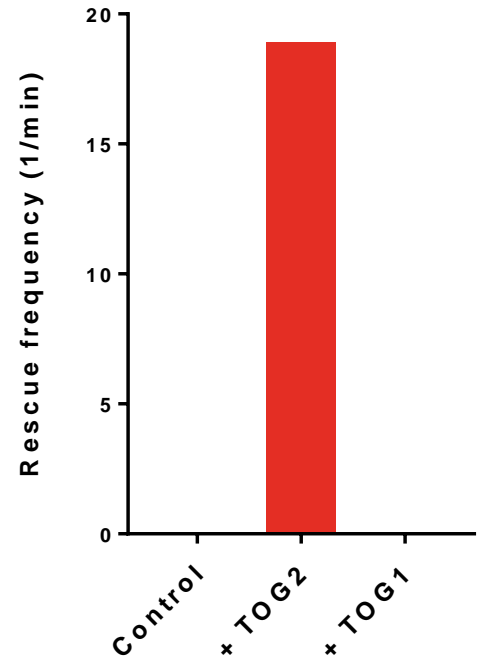



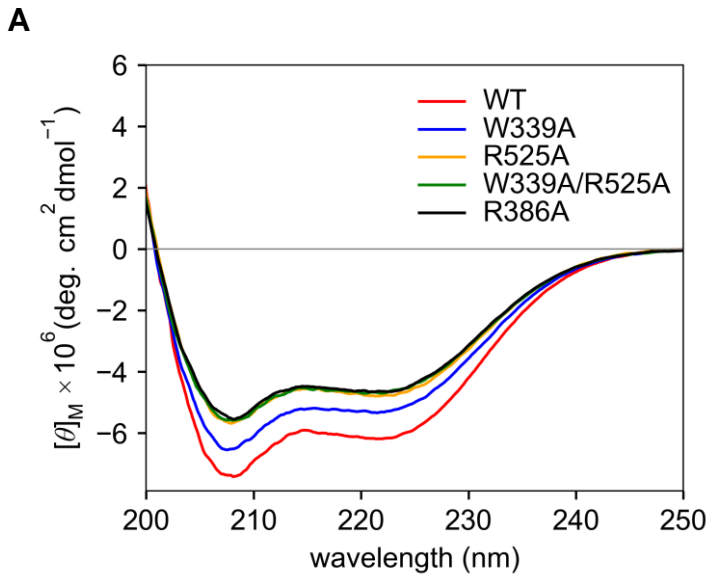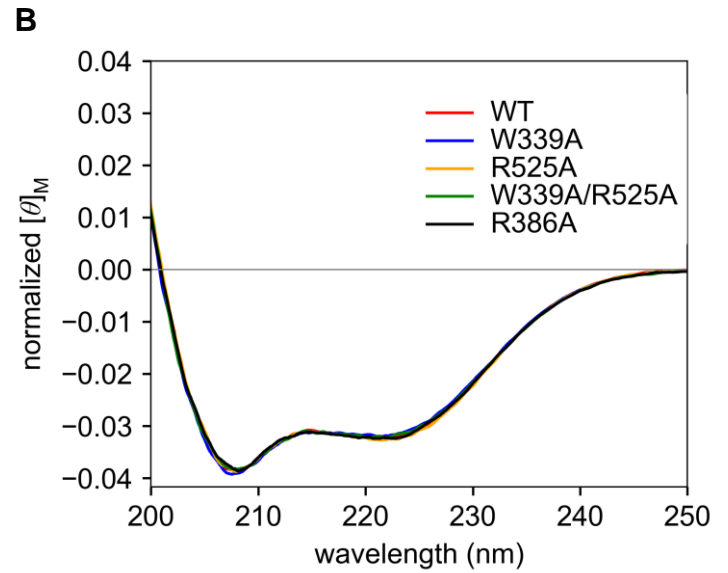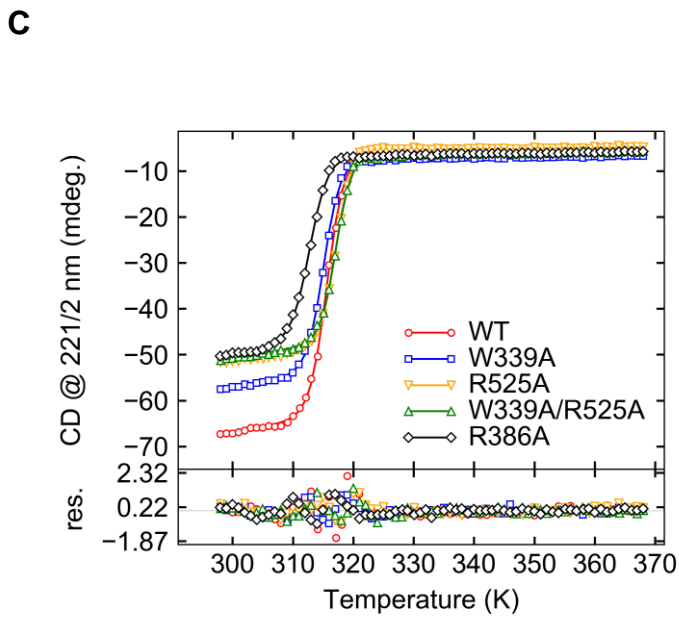

**D**

| STU1-TOG2 construct | Apparent $T_m$ (K) |
|---------------------|--------------------|
| Wild-type           | 317.5              |
| W339A               | 315.1              |
| R525A               | 317.2              |
| W339A/R525A         | 317.2              |
| R386A               | 312.8              |

A

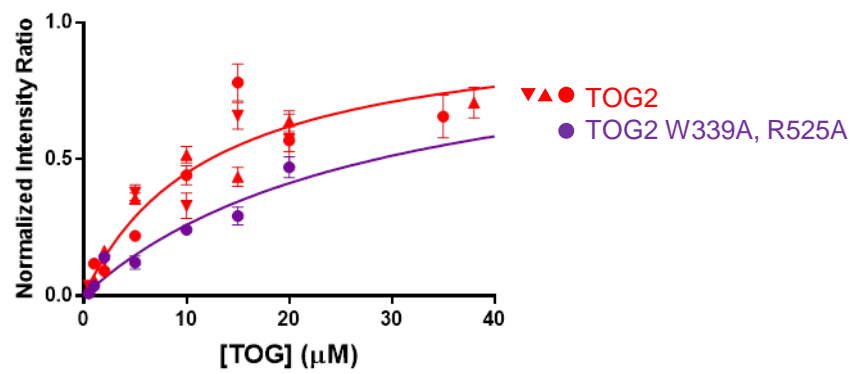

B

|                   | $K_D$ ( $\mu\text{M}$ ) |
|-------------------|-------------------------|
| TOG2              | $12 \pm 3$              |
| TOG2 W339A, R525A | $29 \pm 8$              |

A

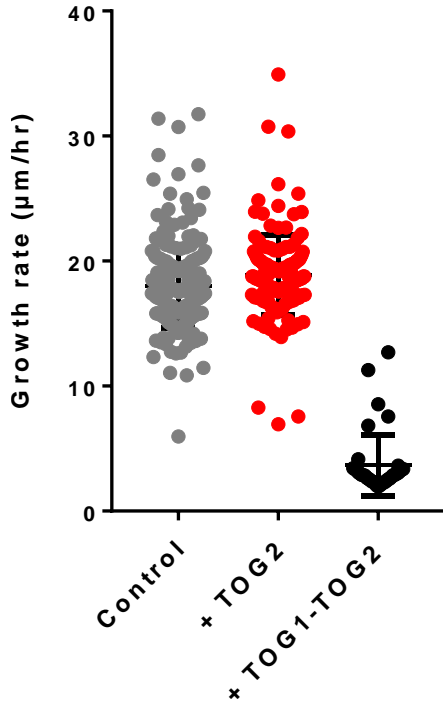

B

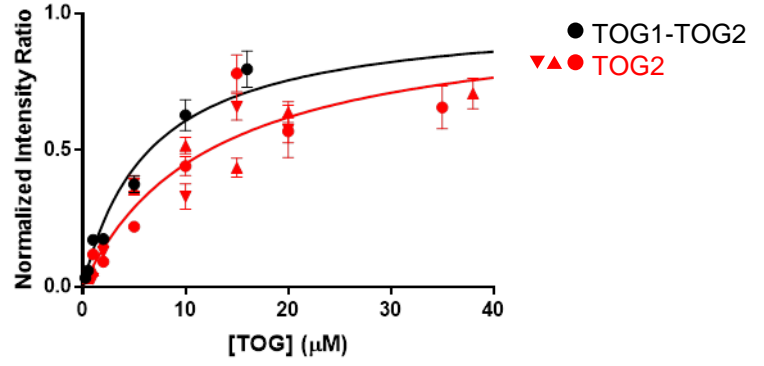

|           | $K_D$ ( $\mu\text{M}$ ) |
|-----------|-------------------------|
| TOG2      | 12 $\pm$ 3              |
| TOG1-TOG2 | 7 $\pm$ 2               |

C

AUC:  $K_D = 720$  [670, 780] nM

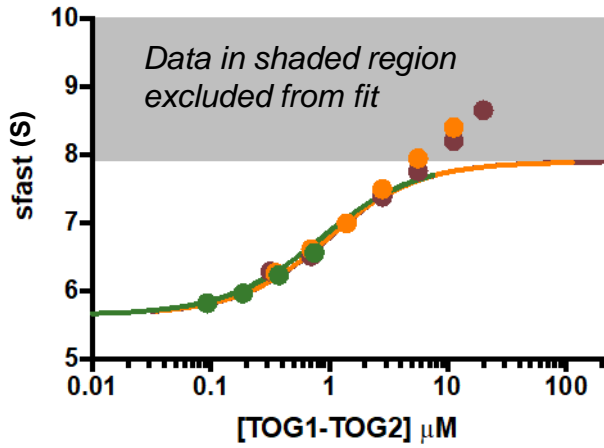

MST:  $K_D = 130$  [100, 170] nM

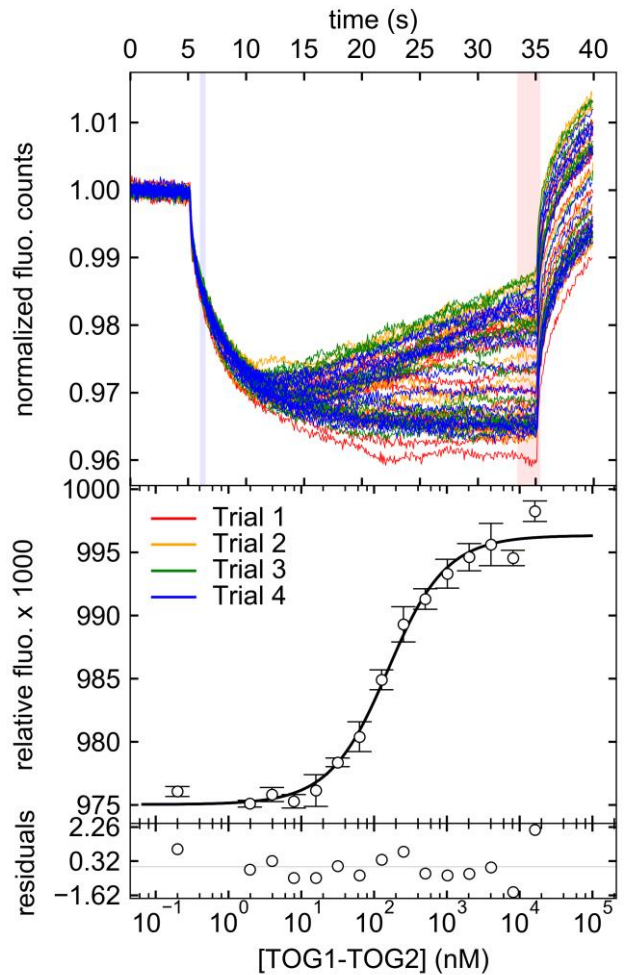

Supplement: mbc-29-1359-s001.pdf [file mbc-29-1359-s001.pdf]
